# Supplementary material
Source: MDPI journal article supplement (https://www.mdpi.com/2297-8739/9/7/159)
Supplement: s1 [file s1]

Supplementary Materials

# Chemical Fingerprinting Profile and Targeted Quantitative Analysis of Phenolic Compounds from Rooibos Tea (*Aspalathus linearis*) and Dietary Supplements Using UHPLC-PDA-MS

Omer I. Fantoukh <sup>1,2,\*</sup>, Yan-Hong Wang <sup>3</sup>, Abidah Parveen <sup>1,3,4</sup>, Mohammed F. Hawwal <sup>2</sup>, Zulfiqar Ali <sup>3</sup>, Gadah A. Al-Hamoud <sup>2</sup>, Amar G. Chittiboyina <sup>3</sup>, Elizabeth Joubert <sup>5,6</sup>, Alvaro Viljoen <sup>7</sup> and Ikhlas A. Khan <sup>1,3,\*</sup>

|    | Name          | Channel  | R        | R <sup>2</sup> | Equation          |
|----|---------------|----------|----------|----------------|-------------------|
| 1  | Syringin      | 280.0 nm | 0.999211 | 0.998424       | Y = 2800 X + 823  |
| 2  | Eriodictyol 1 | 280.0 nm | 0.999198 | 0.998396       | Y = 1760 X + 703  |
| 3  | Eriodictyol 2 | 280.0 nm | 0.999328 | 0.998656       | Y = 1840 X + 538  |
| 4  | Isoorientin   | 280.0 nm | 0.999653 | 0.999306       | Y = 2520 X – 1640 |
| 5  | Orientin      | 280.0 nm | 0.998531 | 0.997064       | Y = 1790 X + 113  |
| 6  | Aspalathin    | 280.0 nm | 0.999529 | 0.999059       | Y = 4620 X – 2300 |
| 7  | Vitexin       | 280.0 nm | 0.998984 | 0.997969       | Y = 1500 X – 879  |
| 8  | Bioquercetin  | 280.0 nm | 0.994722 | 0.989471       | Y = 1630 X + 6590 |
| 9  | Hyperoside    | 280.0 nm | 0.997803 | 0.995611       | Y = 753 X – 1640  |
| 10 | Isovitexin    | 280.0 nm | 0.999337 | 0.998674       | Y = 3970 X – 1120 |
| 11 | Rutin         | 280.0 nm | 0.998812 | 0.997625       | Y = 1620 X – 475  |
| 12 | Isoquercitrin | 280.0 nm | 0.998852 | 0.997705       | Y = 1190 X – 1520 |
| 13 | Nothofagin    | 280.0 nm | 0.999291 | 0.998583       | Y = 5760 X – 2530 |
| 14 | Thermopsoside | 280.0 nm | 0.999190 | 0.998380       | Y = 3450 X + 383  |

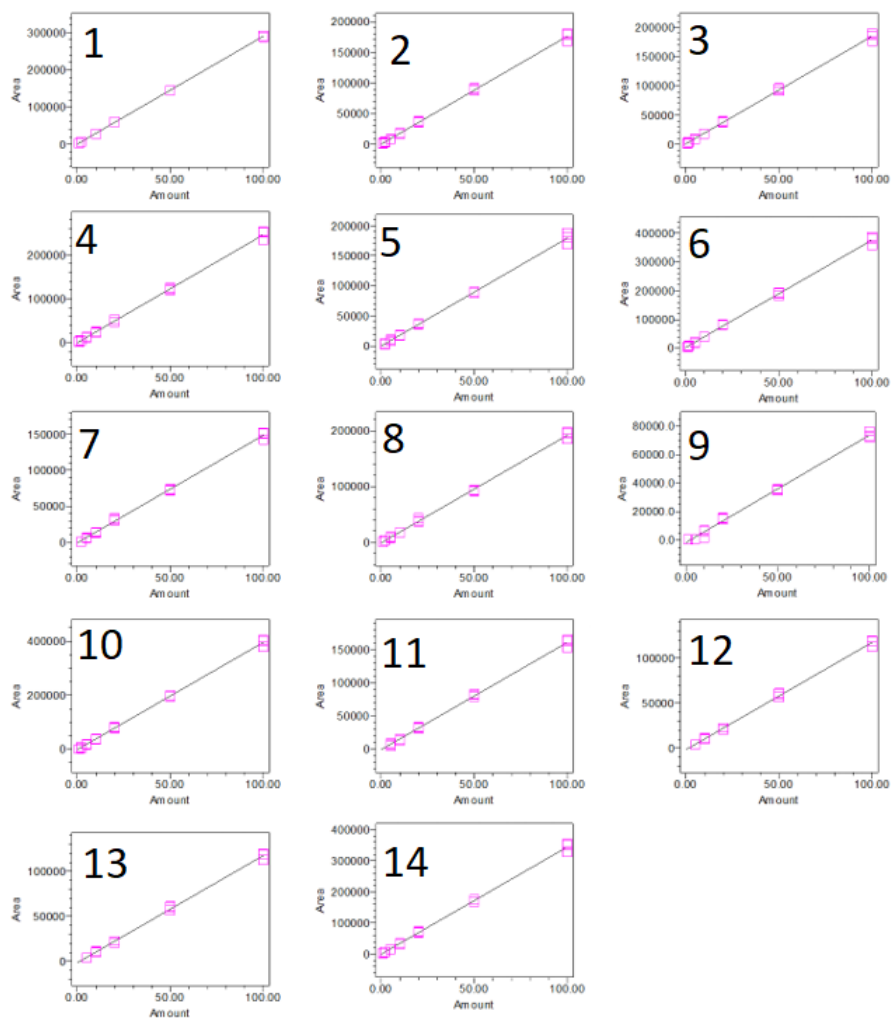

**Figure S1.** Calibration curves for compounds 1-14.

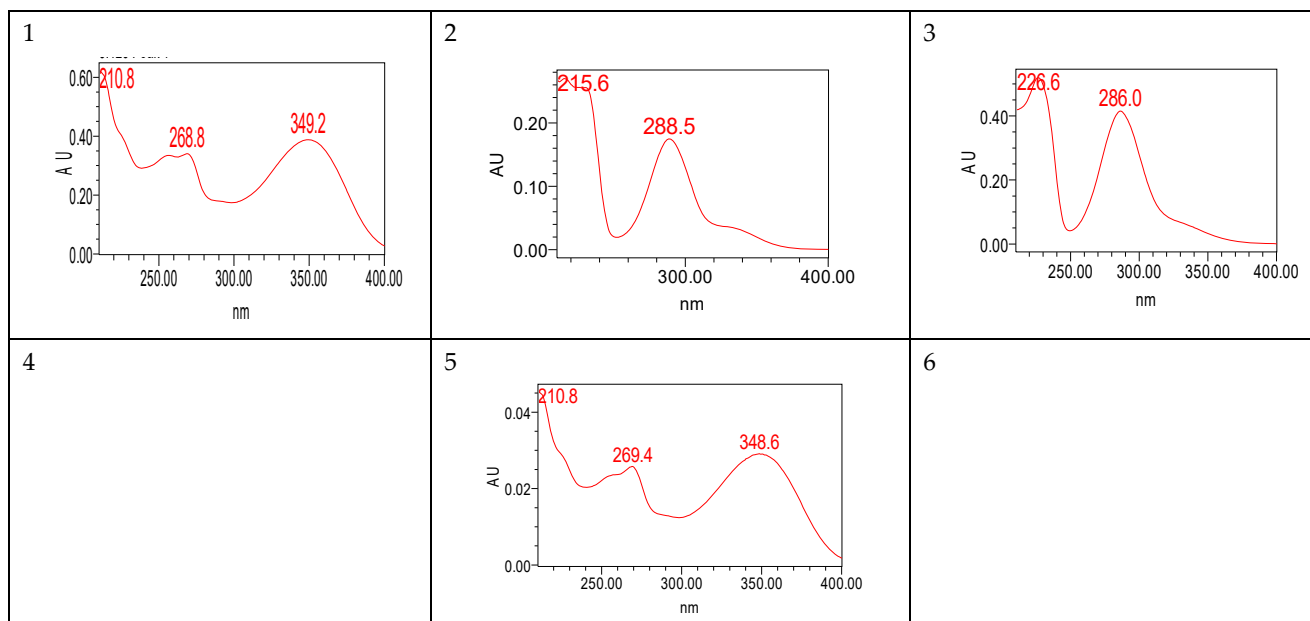

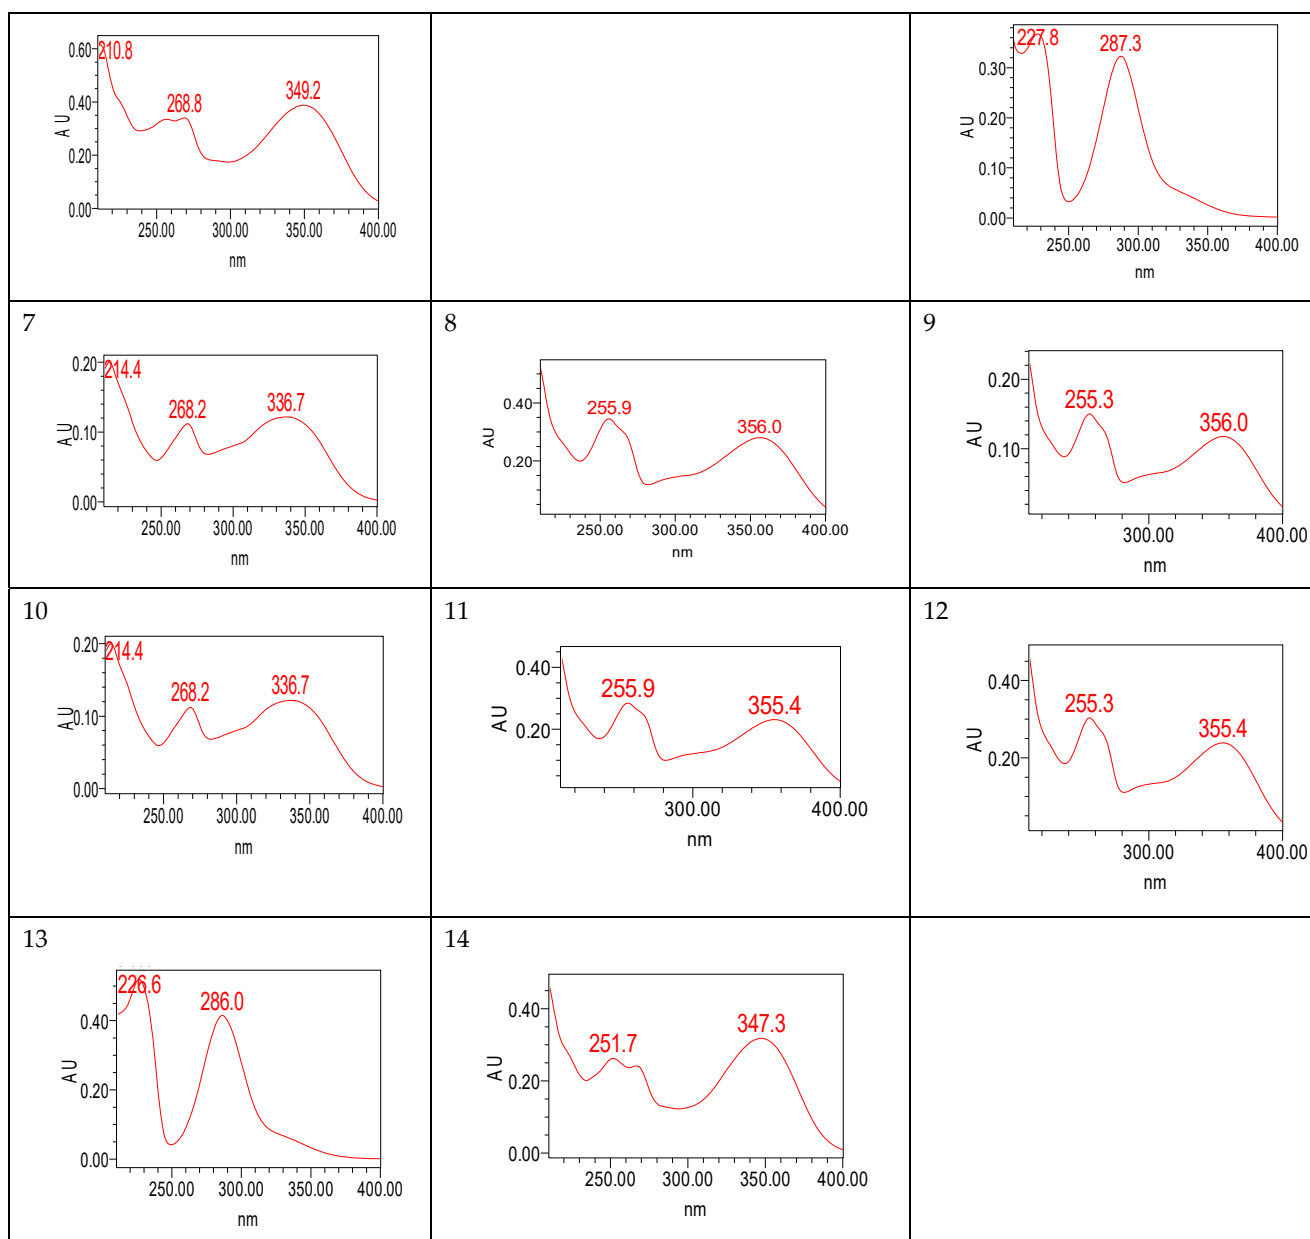

Figure S2. UV spectra for compounds 1-14.

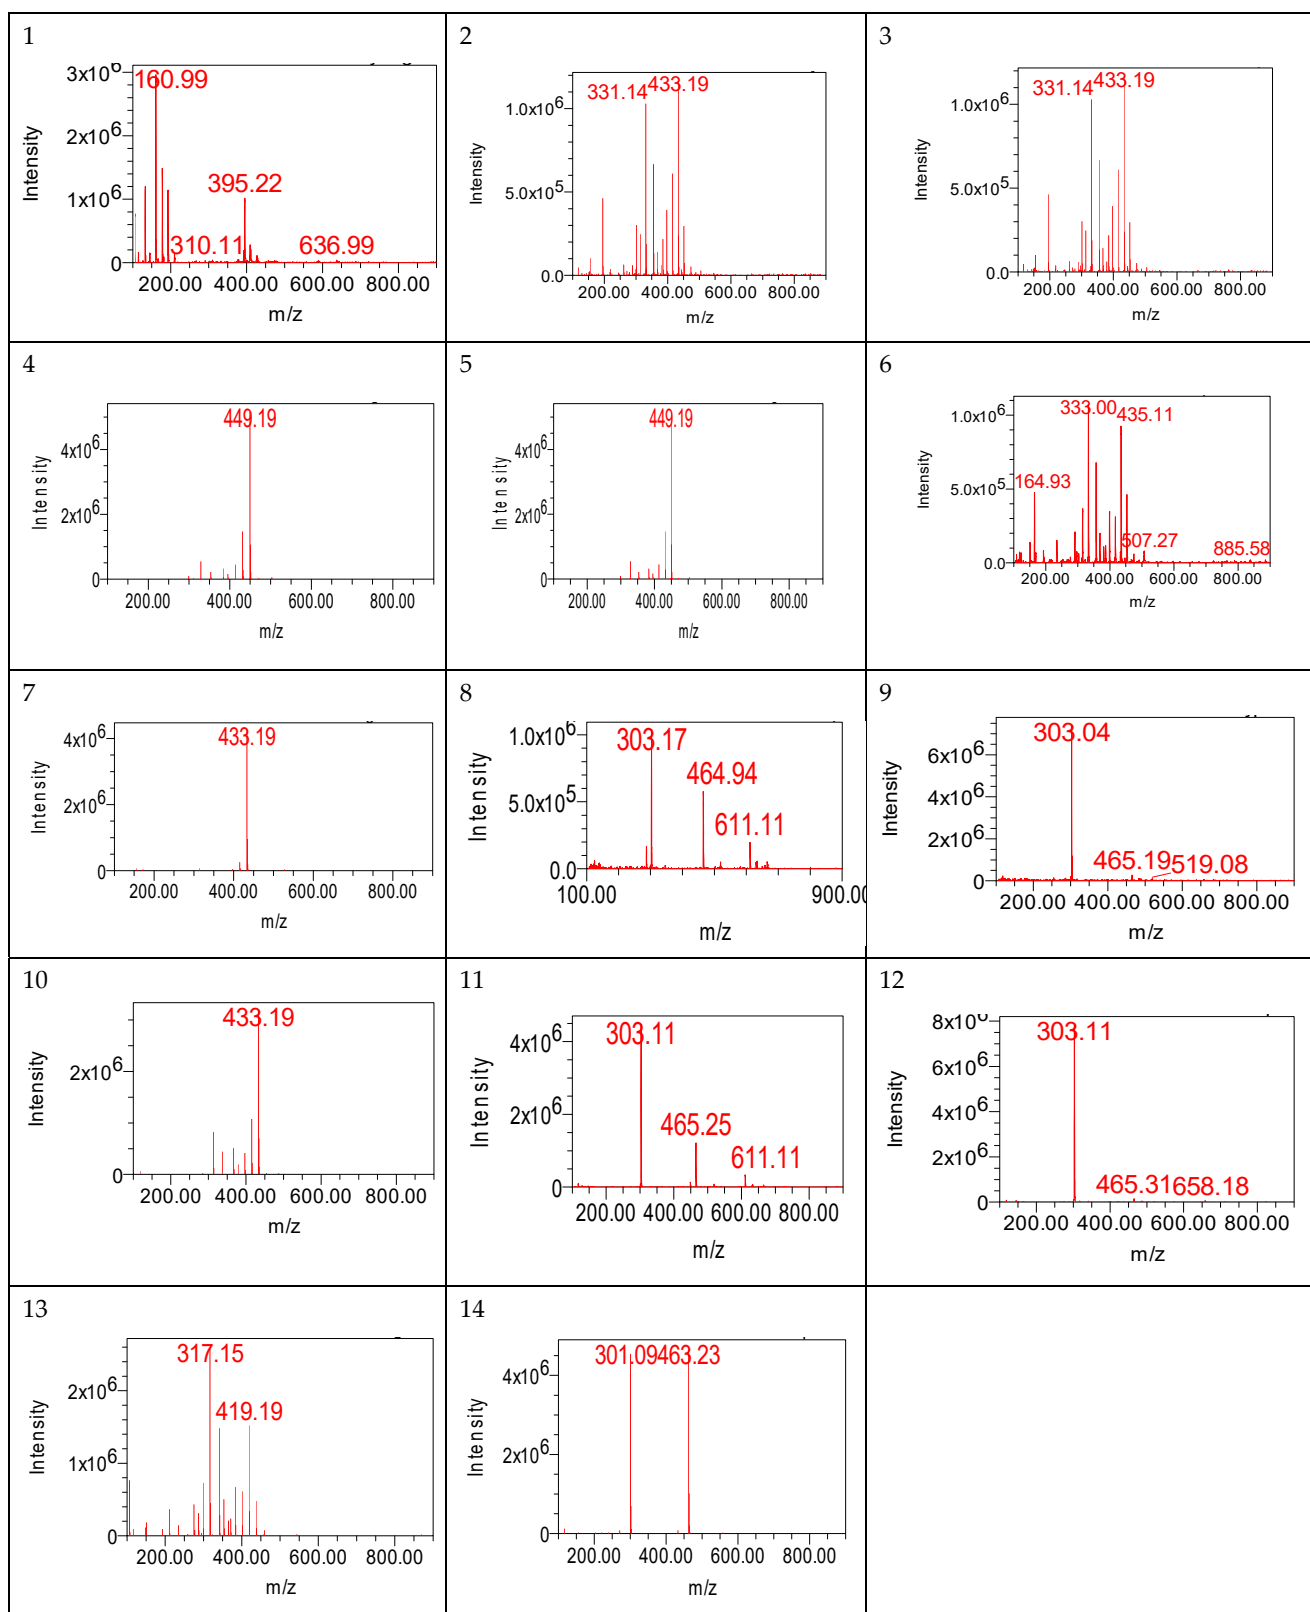

**Figure S3.** The positive mode of Mass spectra for compounds **1-14**.

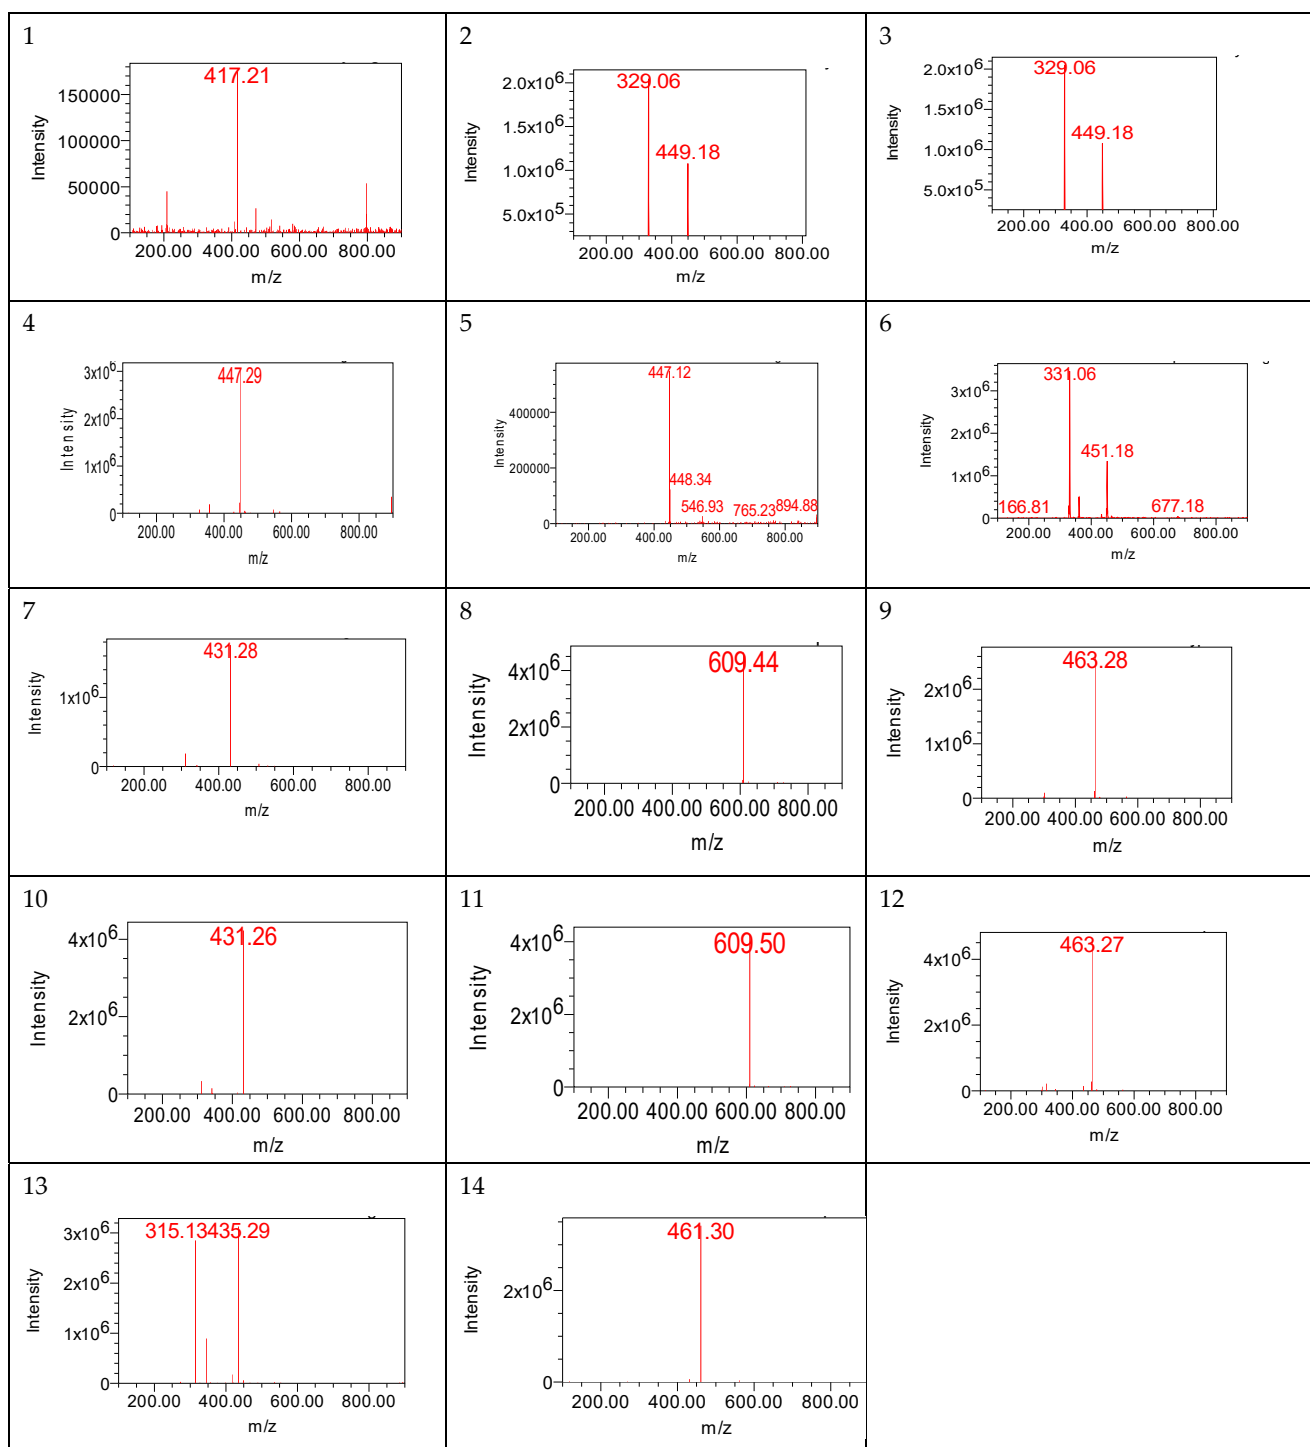

**Figure S4.** The negative mode of Mass spectra for compounds 1-14.

a) Column: HSS T3, 2.1 x 100 mm at 55 °C

| Time (min) | Flow (mL/min) | % MeCN w/ 0.05% FA | % Water w/ 0.05% FA |
|------------|---------------|--------------------|---------------------|
| 0.00       | 0.35          | 12.0               | 88.0                |
| 5.00       | 0.35          | 16.0               | 84.0                |
| 10.00      | 0.35          | 18.0               | 82.0                |
| 12.00      | 0.35          | 20.0               | 80.0                |
| 13.00      | 0.35          | 50.0               | 50.0                |
| 14.00      | 0.35          | 100                | 0.0                 |

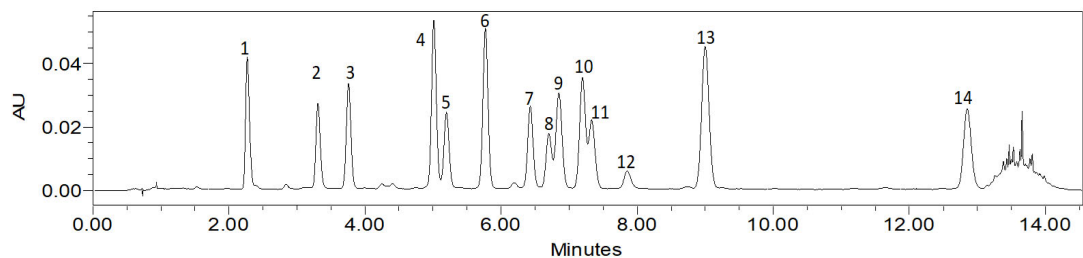

b) Column: Acquity UPLC BEH Shield RP18, 1.8 um, 2.1 x 100 mm at 45 °C

| Time (min) | Flow (mL/min) | % MeCN w/ 0.05% FA | % Water w/ 0.05% FA |
|------------|---------------|--------------------|---------------------|
| 0.00       | 0.35          | 5.0                | 95.0                |
| 1.00       | 0.35          | 10.0               | 90.0                |
| 7.00       | 0.35          | 25.0               | 75.0                |
| 8.00       | 0.35          | 100.0              | 0.0                 |

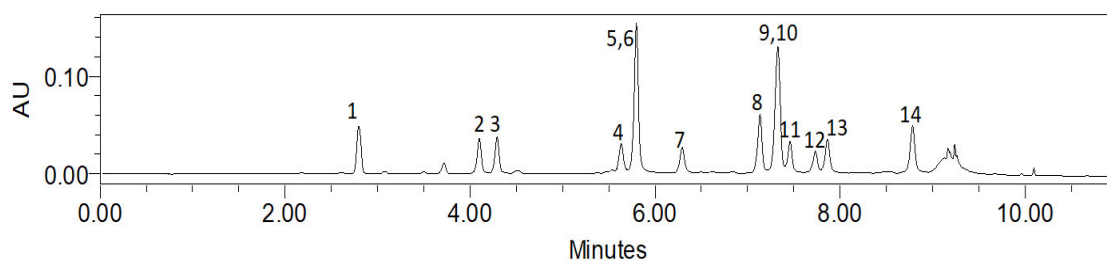

c) Column: Cortecs UPLC C18, 1.6 um, 2.1 x 100 mm at 30 °C

| Time (min) | Flow (mL/min) | % MeCN w/ 0.05% FA | % Water w/ 0.05% FA |
|------------|---------------|--------------------|---------------------|
| 0.00       | 0.40          | 10.0               | 90.0                |
| 22.00      | 0.40          | 10.0               | 90.0                |
| 30.00      | 0.40          | 25.0               | 75.0                |
| 32.00      | 0.40          | 100.0              | 0.0                 |

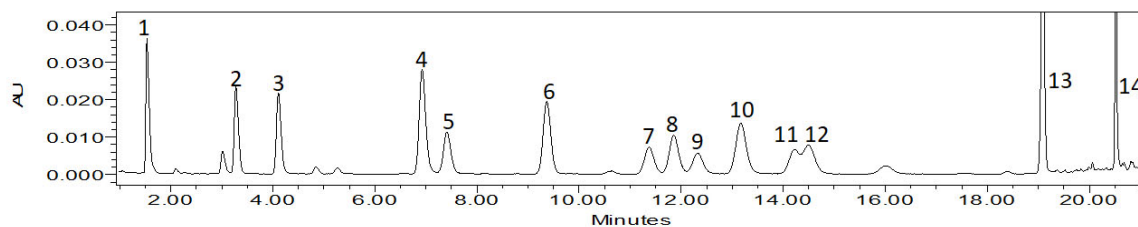

d) Column: Cortecs UPLC C18, 1.6  $\mu$ m, 2.1 x 100 mm at 30  $^{\circ}$ C

| Time (min) | Flow (mL/min) | % MeCN w/ 0.05% FA | % Water w/ 0.05% FA |
|------------|---------------|--------------------|---------------------|
| 0.00       | 0.35          | 10.0               | 90.0                |
| 22.00      | 0.35          | 10.0               | 90.0                |
| 30.00      | 0.35          | 25.0               | 75.0                |
| 32.00      | 0.35          | 100.0              | 0.0                 |

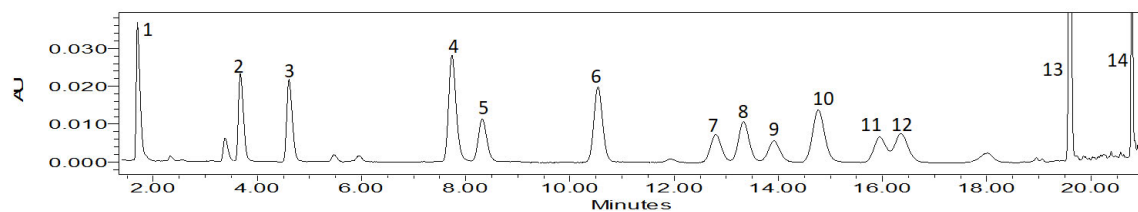

e) Column: Cortecs UPLC C18, 1.6  $\mu$ m, 2.1 x 100 mm at 30  $^{\circ}$ C

| Time (min) | Flow (mL/min) | % MeCN w/ 0.05% FA | % Water w/ 0.05% FA |
|------------|---------------|--------------------|---------------------|
| 0.00       | 0.30          | 10.0               | 90.0                |
| 22.00      | 0.30          | 10.0               | 90.0                |
| 30.00      | 0.30          | 25.0               | 75.0                |
| 32.00      | 0.30          | 100.0              | 0.0                 |

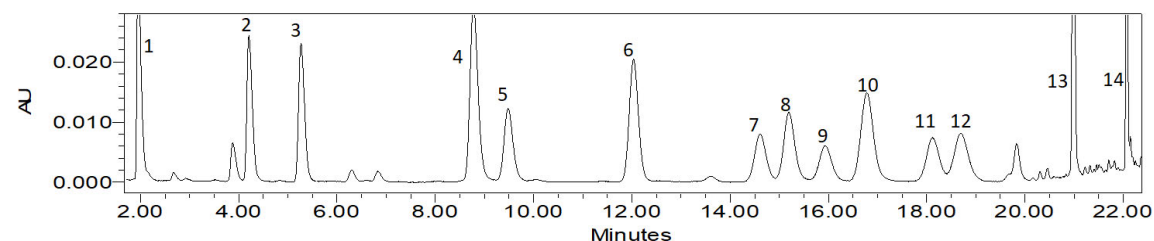

f) Column: Cortecs UPLC C18, 1.6  $\mu$ m, 2.1 x 100 mm at 30  $^{\circ}$ C

| Time (min) | Flow (mL/min) | % MeCN w/ 0.05% FA | % Water w/ 0.05% FA |
|------------|---------------|--------------------|---------------------|
| 0.00       | 0.25          | 10.0               | 90.0                |
| 22.00      | 0.25          | 10.0               | 90.0                |
| 30.00      | 0.25          | 25.0               | 75.0                |
| 32.00      | 0.25          | 100.0              | 0.0                 |

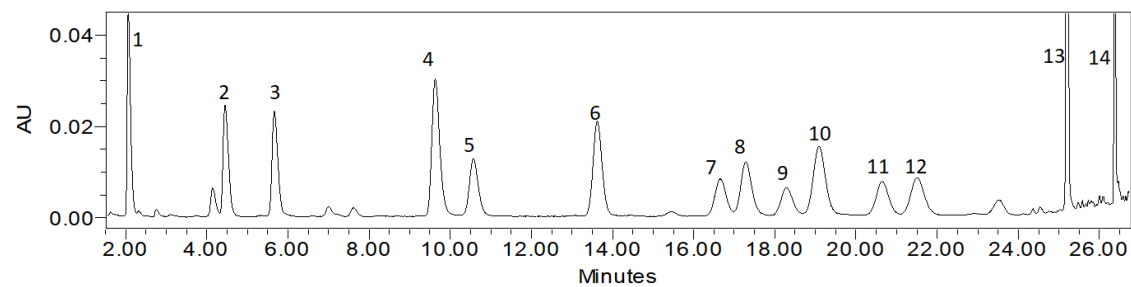

**Figure S5.** Different chromatograms for different columns and flow rates tried in the method development and optimization at 280 nm.



**Table S1.** Inter-day and Intra-day precision (% RSD) and recovery analysis for *A. linearis* #16850 samples.

| Compound No. | Analytes      | Intra-Day (n=3) |       |       | Inter-day (n=9) | Amount added (µg) | Amount Found (µg) | Recovery Rate (%) | LOD (mg/100 mg) | LOD (µg/mL) | LOQ (mg/100 mg) | LOQ (µg/mL) |
|--------------|---------------|-----------------|-------|-------|-----------------|-------------------|-------------------|-------------------|-----------------|-------------|-----------------|-------------|
|              |               | Day 1           | Day 2 | Day 3 |                 |                   |                   |                   |                 |             |                 |             |
| 1            | Syringin      | 1.54            | 1.07  | 0.60  | 2.5             | 6.87              | 6.48              | 94.21             | 0.003           | 0.5         | 0.012           | 2           |
| 2            | Eriodictyol 1 | 1.73            | 2.25  | 1.55  | 5.1             | 6.69              | 6.77              | 101.27            | 0.006           | 1           | 0.031           | 5           |
| 3            | Eriodictyol 2 | 2.21            | 2.06  | 1.09  | 5.9             | 8.10              | 8.06              | 99.46             | 0.006           | 1           | 0.031           | 5           |
| 4            | Isoorientin   | 1.57            | 1.04  | 1.52  | 1.5             | 13.31             | 13.08             | 98.25             | 0.004           | 0.5         | 0.018           | 2           |
| 5            | Orientin      | 0.78            | 1.12  | 1.21  | 1.2             | 13.92             | 12.46             | 89.50             | 0.010           | 1           | 0.050           | 5           |
| 6            | Aspalathin    | 1.41            | 1.29  | 1.06  | 1.3             | 15.89             | 17.13             | 107.82            | 0.002           | 0.5         | 0.007           | 2           |
| 7            | Vitexin       | 1.32            | 3.80  | 4.26  | 3.9             | 5.66              | 6.19              | 109.36            | 0.010           | 1           | 0.050           | 5           |
| 8            | Bioquercetin  | 1.36            | 4.12  | 1.30  | 3.1             | 4.67              | 4.25              | 91.04             | 0.004           | 1           | 0.020           | 5           |
| 9            | Hyperoside    | 1.38            | 3.63  | 2.79  | 2.7             | 8.20              | 8.95              | 109.09            | 0.004           | 1           | 0.019           | 5           |
| 10           | Isovitexin    | 1.34            | 1.33  | 1.74  | 1.5             | 6.08              | 6.05              | 99.50             | 0.006           | 0.5         | 0.025           | 2           |
| 11           | Rutin         | 0.74            | 3.25  | 3.71  | 2.5             | 6.78              | 6.42              | 94.60             | 0.007           | 1           | 0.030           | 5           |
| 12           | Isoquercitrin | 1.75            | 1.73  | 2.67  | 2.3             | 6.61              | 7.18              | 108.64            | 0.004           | 1           | 0.019           | 5           |
| 13           | Nothofagin    | 1.13            | 1.69  | 0.15  | 2.3             | 5.29              | 5.21              | 98.47             | 0.001           | 0.2         | 0.005           | 1           |
| 14           | Thermopsoside | 1.08            | 0.54  | 0.73  | 2.2             | 6.49              | 6.05              | 93.16             | 0.005           | 0.5         | 0.020           | 2           |
